# Supplementary material for: Understanding the Z-scheme heterojunction of BiVO4/PANI for photoelectrochemical nitrogen reduction
Source: Royal Society of Chemistry journal article supplement (doi:10.1039/d1cc03687d), 2021-01-01
Supplement: d1cc03687d1.pdf [file d1cc03687d1.pdf]

Support Information

**Understanding Z-Scheme Heterojunction of BiVO<sub>4</sub>/PANI  
for Photoelectrochemical Nitrogen Reduction**

Yajie Bai,<sup>a†</sup> Hongye Bai,<sup>a†</sup> Zhenyuan Fang,<sup>b</sup> Xia Li,<sup>a</sup> Weiqiang Fan,<sup>\*a</sup> Weidong Shi<sup>\*a</sup>

<sup>a</sup> *School of Chemistry and Chemical Engineering, Jiangsu University, Zhenjiang, 212013, PR China.*

<sup>b</sup> *School of Chemistry, Beihang University, Beijing, 100191, P. R. China*

<sup>†</sup> *These authors contributed equally to this work.*

*\*Emails: fwq4993329@ujs.edu.cn (W. Fan), swd1978@ujs.edu.cn (W. Shi)*

## **Materials**

All chemical reagents are of analytical grade and used without further purification. Bismuth nitrate pentahydrate ( $\text{Bi}(\text{NO}_3)_3 \cdot 5\text{H}_2\text{O}$ ), ammonium vanadate ( $\text{NH}_4\text{VO}_3$ ), ethylenediaminetetraacetic acid disodium salt (EDTA-2Na), sodium hydroxide (NaOH), ammonium chloride ( $\text{NH}_4\text{Cl}$ ), hydrazine hydrate ( $\text{N}_2\text{H}_4 \cdot \text{H}_2\text{O}$ ), aniline ( $\text{C}_6\text{H}_7\text{N}$ ), nitric acid and sulfuric acid potassium sodium tartrate ( $\text{NaKC}_4\text{H}_4\text{O}_6$ ), Nessler's reagent, hydrogen nitrate ( $\text{HNO}_3$ , 65%~68%) were all obtained from Aladdin Reagent Co. The FTO glass substrates used in the experiment were washed by acetone and ethanol for 25 minutes in advance.

## **Characterization**

The morphology of samples was investigated by transmission electron microscopy (TEM, Tecnai G2 F20 S-Twin electron microscope (FEI Co.)), and scanning electron microscopy (SEM, Hitachi S-4800 25.0kV 7.5mm×40.0 SE(U)). The crystal structure was collected by high-resolution transmission electron microscope (HRTEM) and X-ray diffractometer (XRD, Bruker D8 ADVANCE). The valence state and composition of elements were detected by X-ray photoelectron spectroscopy (XPS, Thermo Fisher Scientific, Escalab 250Xi, Al Ka). Photoelectrochemical impedance spectroscopy (PEIS) and Mott-Schottky data were tested by electrochemical instrumentation (Princeton, VersaSTAT 3). The absorption spectra were tested by UV-Vis 2550 (Shimadzu, Japan). All photoelectrochemical tests were carried out on the electrochemical system (CHI-852, China).

## **Preparation**

$\text{BiVO}_4$  was prepared through hydrothermal method according to literature.<sup>S1</sup> The synthetic procedure of  $\text{BiVO}_4$  was as follows: 1.94 g  $\text{Bi}(\text{NO}_3)_3 \cdot 5\text{H}_2\text{O}$  and 1.49 g EDTA-2Na were added into 40 mL  $\text{HNO}_3$  (2 M) solution. 0.47 g  $\text{NH}_4\text{VO}_3$  and 1.49 g EDTA-2Na were dissolved in 80 mL  $\text{NaOH}$  (1 M) solution. Then, the mixture was transfer into a 50 ml Teflon-lined autoclave. The FTO glass was put into the Teflon-lined stainless autoclave at an angle against the wall. Then, the autoclave was sealed and transferred to an oven at 160 °C for 12 h. Subsequently,  $\text{BiVO}_4$  sample was repeatedly rinsed with deionized water and dried at room temperature.

$\text{BiVO}_4/\text{PANI}$  was fabricated by an in-situ typical electrodeposition method.<sup>S2</sup> Briefly, 0.9 mL  $\text{C}_6\text{H}_7\text{N}$  was dispersed in 50 mL aqueous solution (0.1 M  $\text{H}_2\text{SO}_4$ ). The electrodeposition was carried out in a three-electrode cell with  $\text{BiVO}_4$  as working electrode,  $\text{Ag}/\text{AgCl}$  as reference electrode, and Pt wire as counter electrode. Cathodic deposition was performed at 0.79 V vs.  $\text{Ag}/\text{AgCl}$  for 20 min (room temperature). Similarly,  $\text{BiVO}_4/\text{PANI}$  sample was repeatedly rinsed with deionized water and dried at room temperature.

### **PEC Measurements**

In this work, PEC measurements were carried out in a double-chamber H-type cell with good airtightness (0.1 M  $\text{Li}_2\text{SO}_4$  electrolyte). For PEC NRR activity tests,  $\text{BiVO}_4/\text{PANI}$  was used as the working electrode, Pt electrode and  $\text{Ag}/\text{AgCl}$  (saturated KCl) electrode were used as counter electrodes and reference, respectively. In the reaction process,  $\text{N}_2$  was continuously introduced into the reactor to make the whole reaction system reach  $\text{N}_2$  saturation. As a conclusion, the good airtightness and

saturated N<sub>2</sub> atmosphere of the cell provide the only N<sub>2</sub> source for the formation of NH<sub>3</sub>. The light source directed at the H-type PEC cell (300 W xenon lamp; 100 mW/cm<sup>2</sup>). The linear sweep voltammogram (LSV) test was carried out with a voltage from -0.4 to 0.2 V vs. RHE (scanning rate is 50 mV/s). The Mott-Schottky plots and photoelectrochemical impedance spectra (PEIS) were measured by an electrochemical analyzer (Princeton, VersaSTAT 3).

### Determination of NH<sub>3</sub>

The NH<sub>3</sub> yield rate was quantitatively determined by the Nessler's reagent method through ultraviolet-visible (UV-vis) spectrophotometry. 50 mL reaction solution was mixed with 1 mL Nessler's reagent and 1 mL potassium sodium tartrate solution. The mixture stood for 15 min, and the absorbance at 425 nm was measured by UV-vis spectrometer. A series of concentration-absorbance curves were calibrated with standard NH<sub>4</sub>Cl solution (Fig. S1a). As shown in Fig. S1b, the calibration curve ( $Y = 0.1730X - 0.0007$ ,  $R^2 = 0.9997$ ) shows an excellent linear relation of absorbance value with NH<sub>3</sub> concentration. The  $r_{NH_3}$  and FE were calculated using the following formula:

$$r_{NH_3} = (C_{NH_3} \times V) / (A \times t)$$

$$FE_{NH_3} = (3 \times F \times C_{NH_3} \times V) / (17 \times Q) \times 100\%$$

Among them,  $A$  is the area of catalyst,  $F$  is the Faraday constant (96485 C mol<sup>-1</sup>),  $C_{NH_3}$  is the concentration of NH<sub>3</sub>,  $V$  is the volume of reaction liquid,  $t$  is the reaction time,  $Q$  is the total electricity consumption.

### Determination of hydrazine hydrate (N<sub>2</sub>H<sub>4</sub>)

The concentration of  $\text{N}_2\text{H}_4$  was estimated by Watt and Chrisp method. The color reagent is composed of 6.0 g para-(dimethylamino) benzaldehyde, 30 mL concentrated hydrochloric and 300 mL ethanol. In detail, 15 mL as-prepared color reagent was mixed with 15 mL electrolyte solution. After 10 min, the concentration-absorbance was measured by UV-vis spectrophotometer at 455 nm with a series of standard  $\text{N}_2\text{H}_4$  solutions (Fig. S2a). As shown in Fig. S2b, the calibration curve ( $Y = 0.4194X - 0.0018$ ,  $R^2 = 0.9991$ ) shows excellent linear relation of absorbance value with  $\text{N}_2\text{H}_4$  concentration.

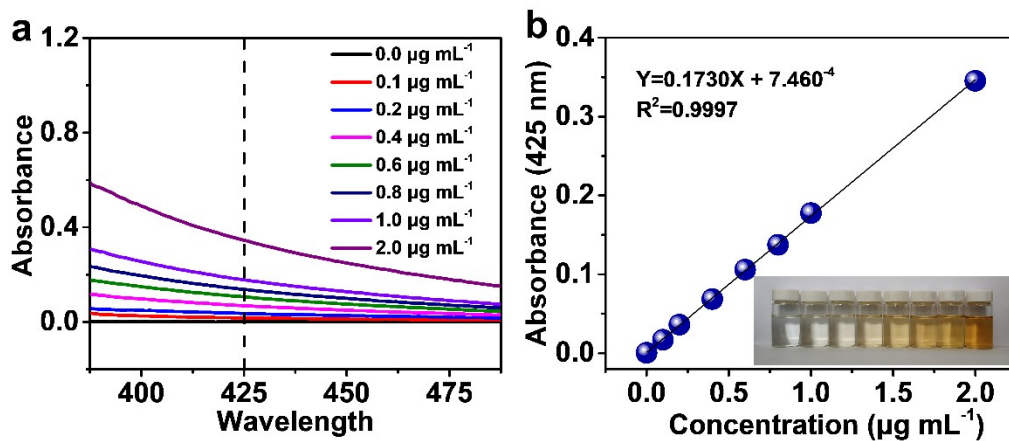

**Fig. S1** (a) Standard absorbance curve of NH<sub>3</sub> yield by Nessler reagent spectrophotometry. (b) Calibration curve.

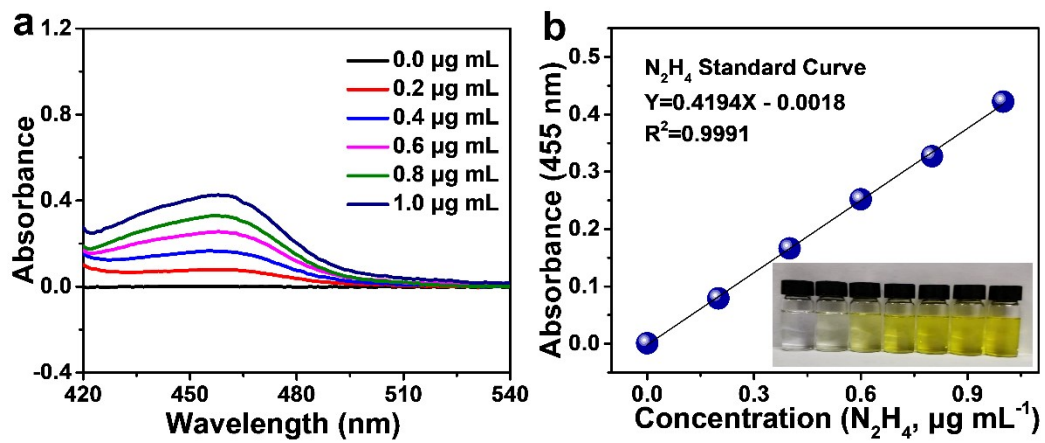

Fig. S2 (a) Standard absorbance curve of  $N_2H_4$  yield by Watt and Chrisp method. (b)

Calibration curve.

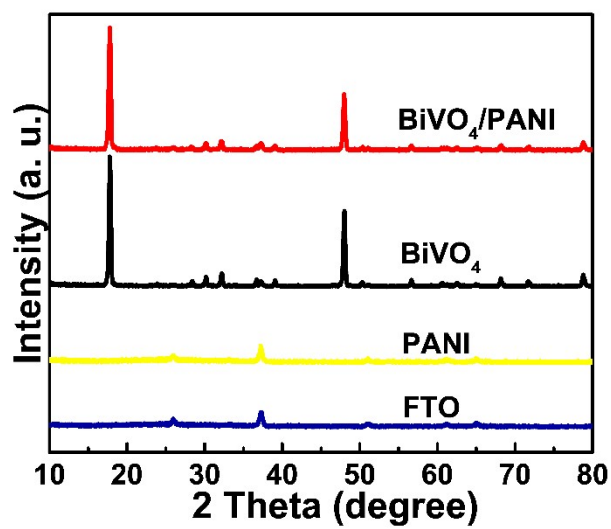

**Fig. S3** XRD patterns of FTO, PANI, BiVO<sub>4</sub> and BiVO<sub>4</sub>/PANI.



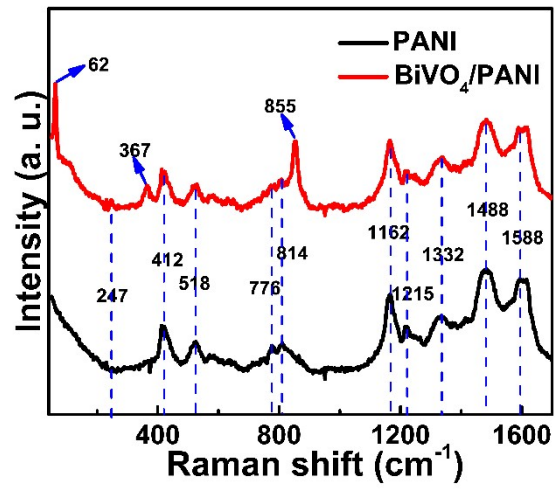

**Fig. S4** Raman spectra of PANI and  $\text{BiVO}_4/\text{PANI}$ .

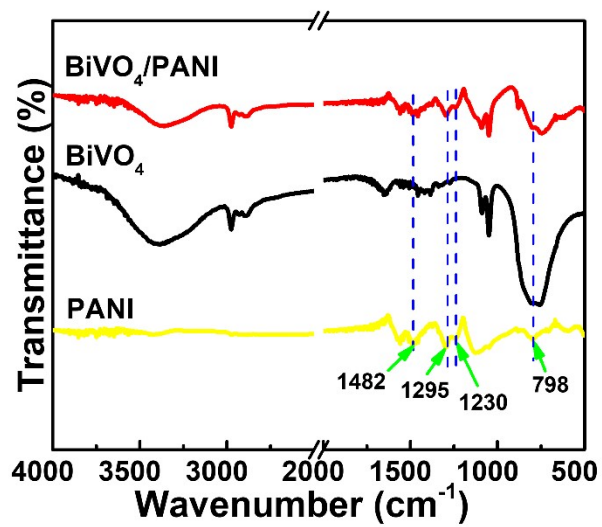

**Fig. S5** FTIR spectra of PANI, BiVO<sub>4</sub> and BiVO<sub>4</sub>/PANI.

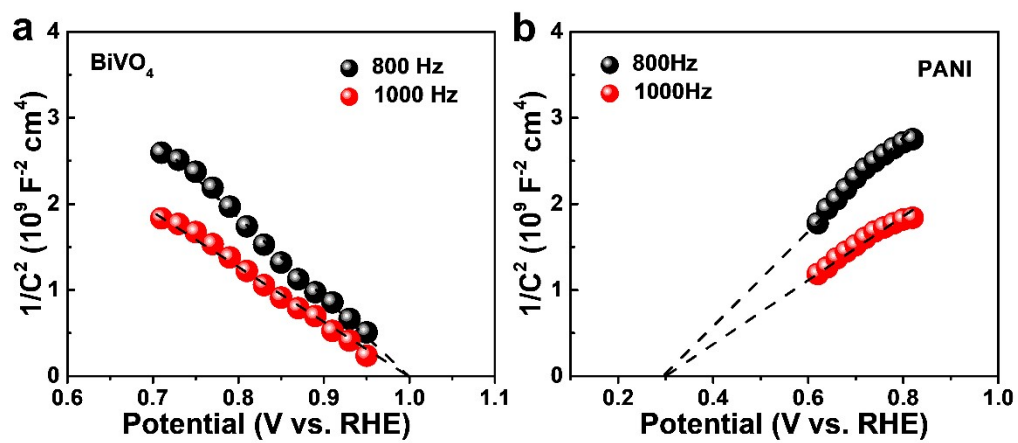

**Fig. S6** Mott-Schottky plots at different frequency: (a)  $\text{BiVO}_4$ , (b) PANI.

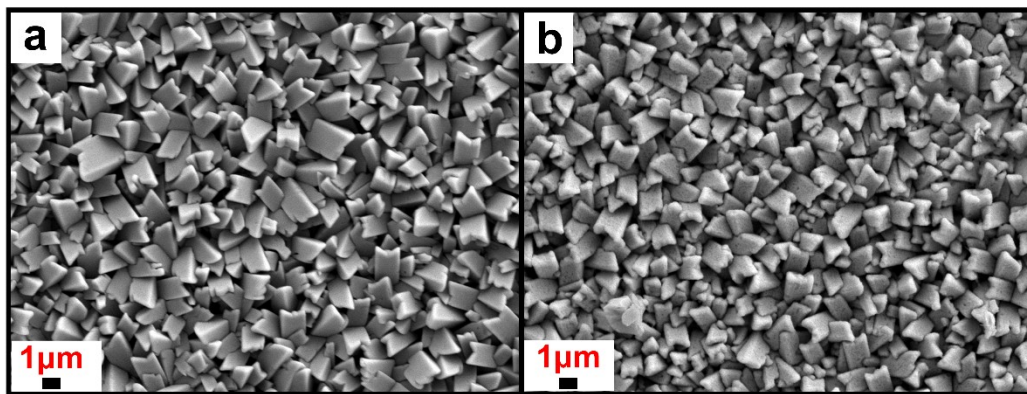

**Fig. S7** (a) SEM images of  $\text{BiVO}_4$  and (b)  $\text{BiVO}_4/\text{PANI}$ .

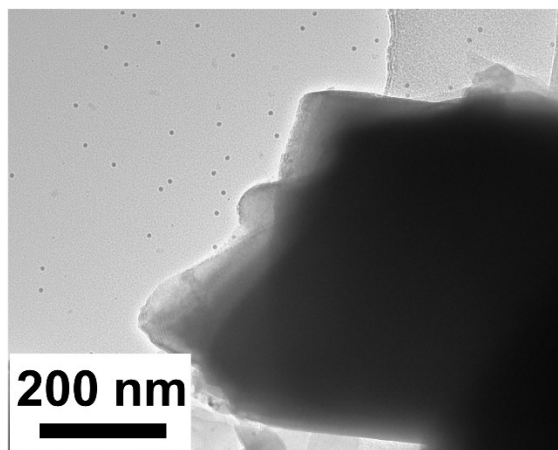

**Fig. S8** (a) TEM image of BiVO<sub>4</sub>/PANI.

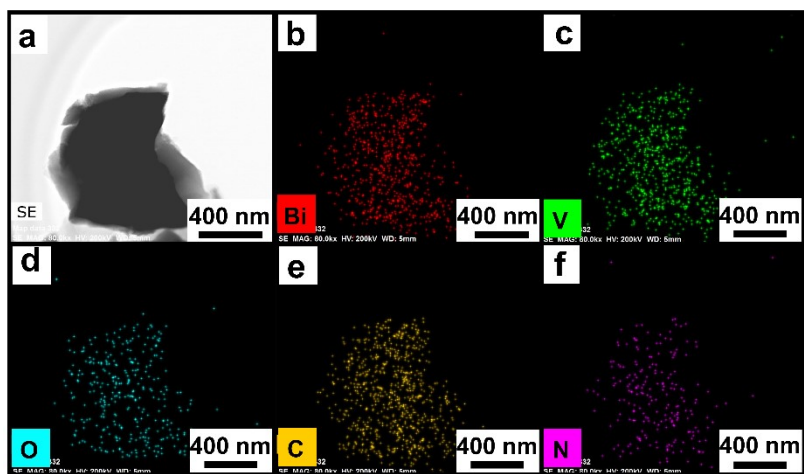

**Fig. S9** (a-f) STEM-EDX EDX mapping of  $\text{BiVO}_4/\text{PANI}$ .

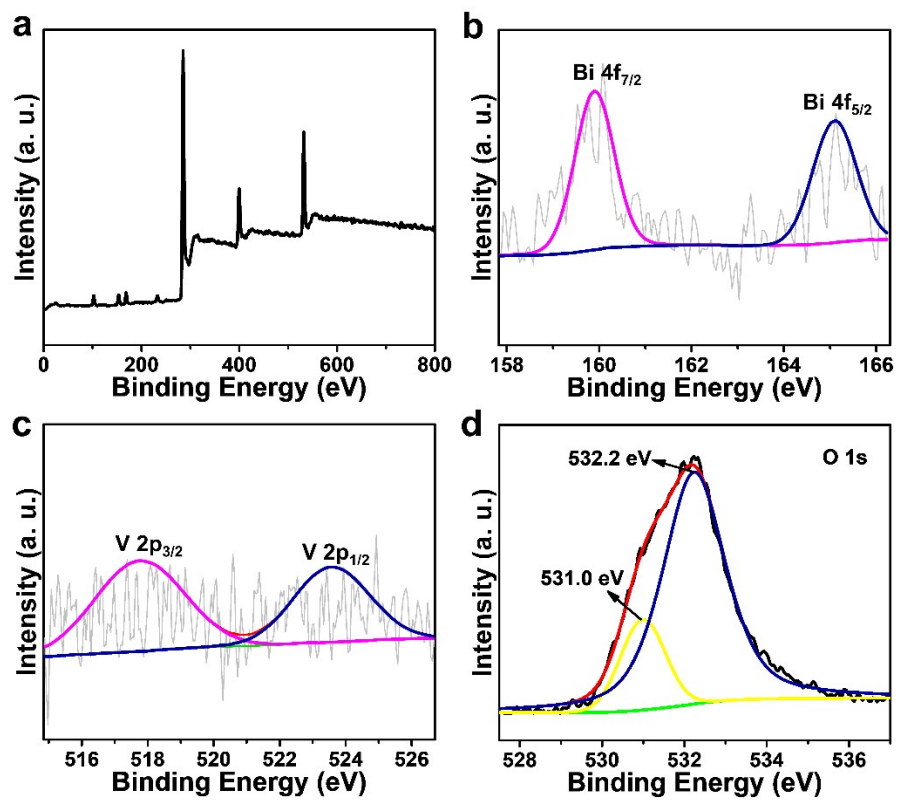

**Fig. S10** XPS spectra of BiVO<sub>4</sub>/PANI: (a) Survey of XPS spectra of (b) Bi 4f, (c) V 2p, (d) O 1s.

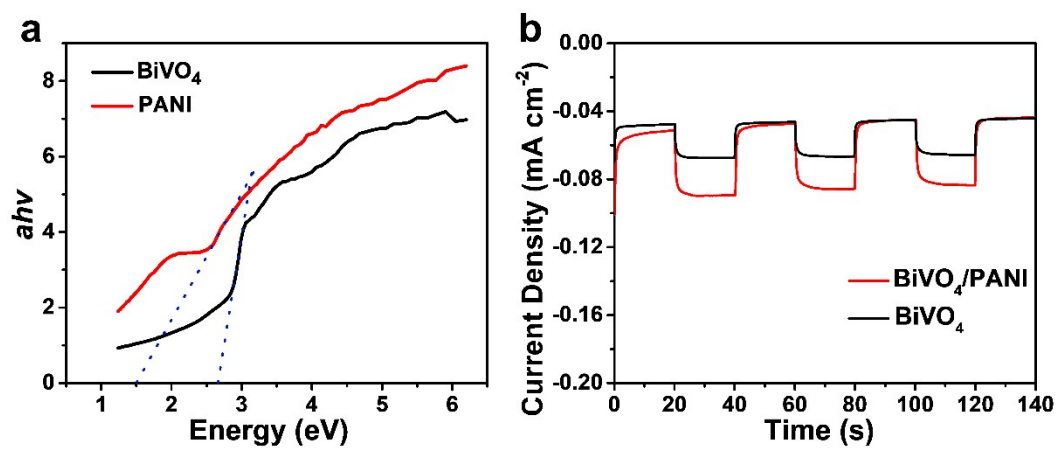

**Fig. S11** (a) Tauc plots of  $\text{BiVO}_4$  and PANI. (b) Transient photocurrent curves under  $100 \text{ mW/cm}^2$  illumination ( $-0.1 \text{ V vs. RHE}$ , scan rate:  $50 \text{ mV/s}$ ).



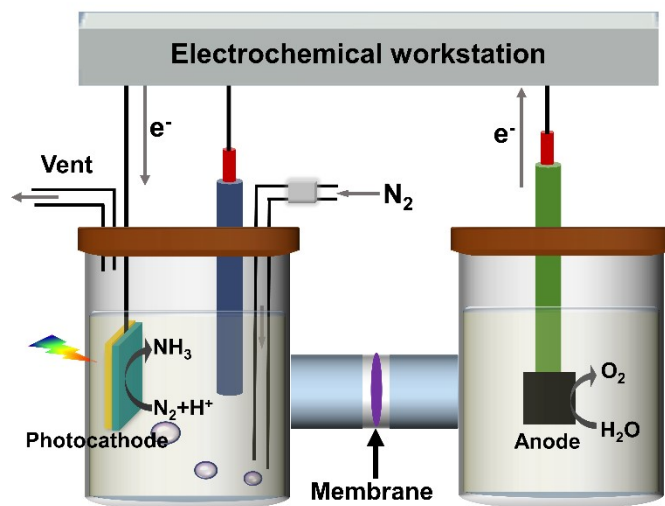

**Scheme S1** Schematic diagram for PEC NRR configuration.

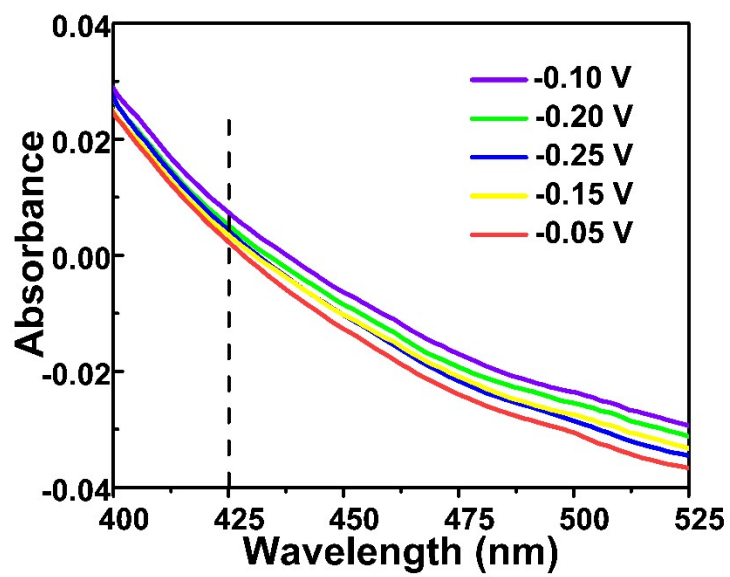

**Fig. S12** UV-vis absorption spectra of different electrolytes colored by the Nessler's reagent.

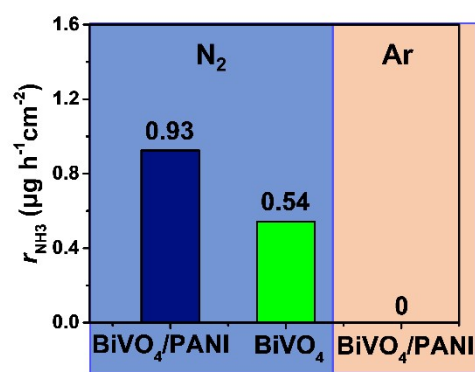

**Fig. S13**  $r_{NH_3}$  in  $N_2$  ( $BiVO_4$  and  $BiVO_4/PANI$ ) and Ar ( $BiVO_4/PANI$ ) atmosphere.

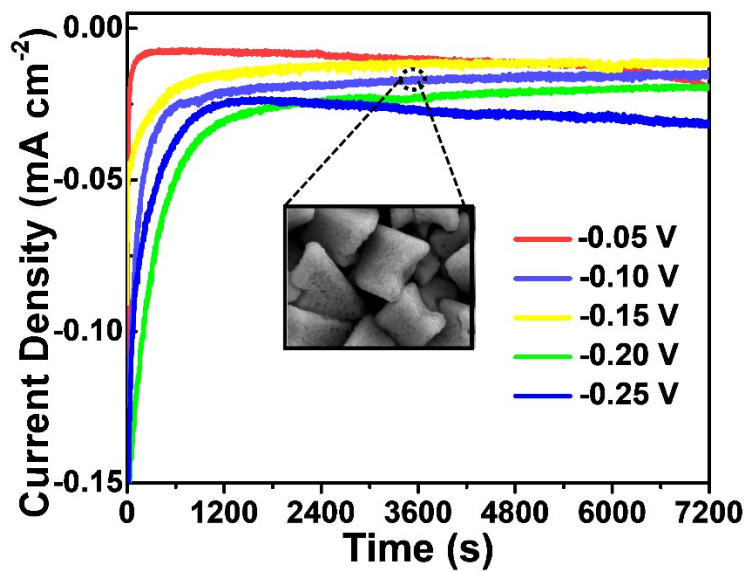

Fig. S14 Chronoamperometry results of BiVO<sub>4</sub>/PANI at different potentials.

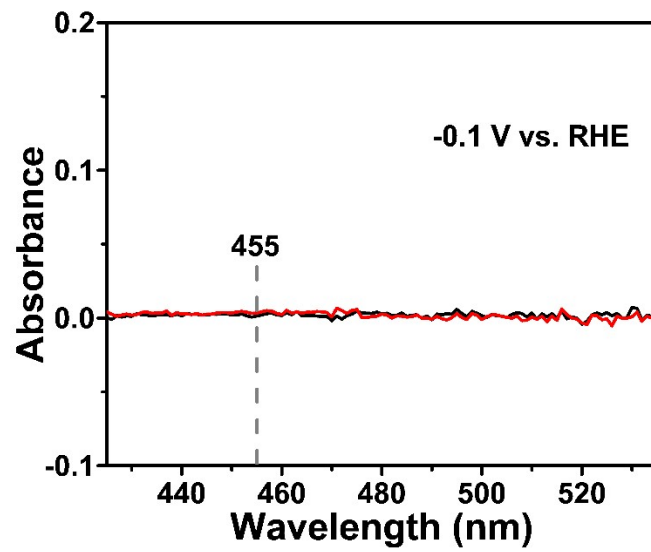

**Fig. S15** UV-vis absorption spectra of  $N_2H_4$  at  $-0.1$  V vs. RHE.

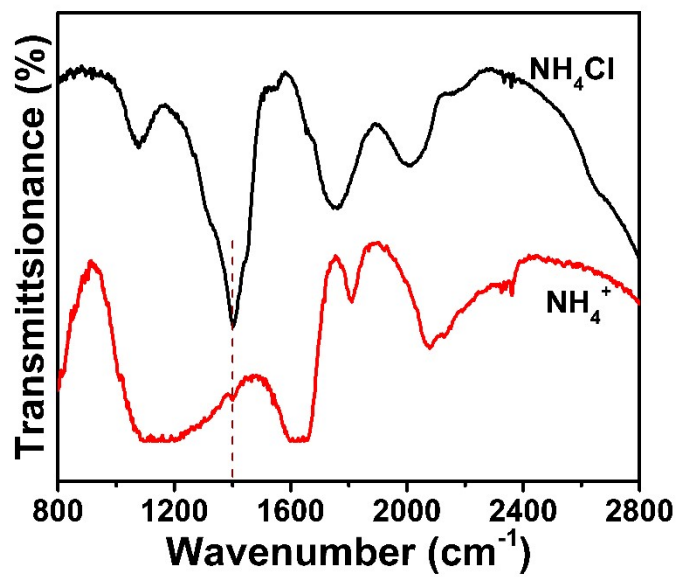

**Fig. S16** FT-IR spectra for standard NH<sub>4</sub>Cl and reaction solution dripped with HCl.

## References

- S1. J. Wang, Y. Song, J. Hu, Y. Lia, Z. Wang, P. Yang, Q. Ma, Q. Che, Y. Dai, B. Huang, *Appl. Catal. B-Environ.* 2019, **251**, 94–101.
- S2. A. I. Inamdar, H. S. Chavan, H. Kim, H. Im, *Sol. Energ. Mat. Sol. C.* 2019, **201**, 110121.
